# Supplementary material for: A data-driven epidemiological prediction method for dengue outbreaks using local and remote sensing data
Source: Springer Nature journal article supplement (doi:10.1186/1472-6947-12-124), 2012-11-05

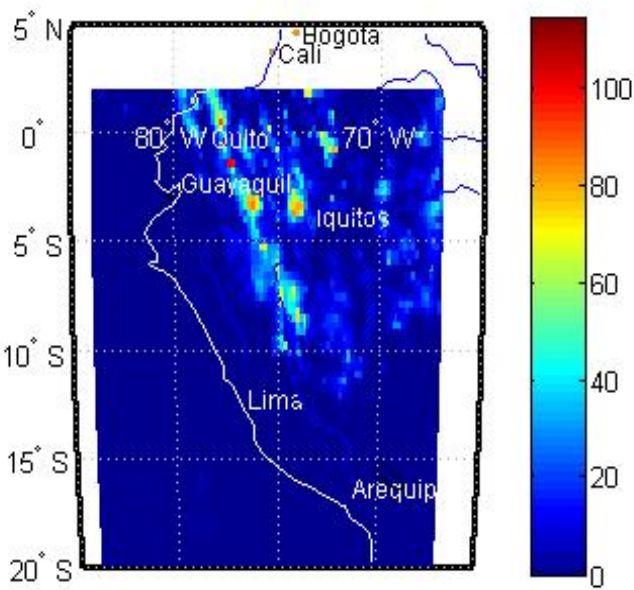

Supplement: 12911_2012_584_MOESM5_ESM.pdf [file 12911_2012_584_MOESM5_ESM.pdf]
