# Supplementary material for: A data-driven epidemiological prediction method for dengue outbreaks using local and remote sensing data
Source: Springer Nature journal article supplement (doi:10.1186/1472-6947-12-124), 2012-11-05
Supplement: 12911_2012_584_MOESM13_ESM.pdf [file 12911_2012_584_MOESM13_ESM.pdf]

Variable Name

Range

Lower

Upper

## NDVIT-8\_T-5

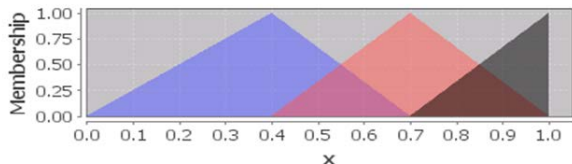

▲ VeryHigh ▲ High ▲ Med

Member Functions

Med

High

VeryHigh

Add

Remove

Auto-Define MFs

Copy MFs

Load MF Mappings

Member Function Parameters

Type

Name

Report Label

Min

Mid

Max

Import

Export

Clear

Done

Cancel
