# Supplementary figures and images for: A data-driven epidemiological prediction method for dengue outbreaks using local and remote sensing data
Source: Springer Nature journal article supplement (doi:10.1186/1472-6947-12-124), 2012-11-05

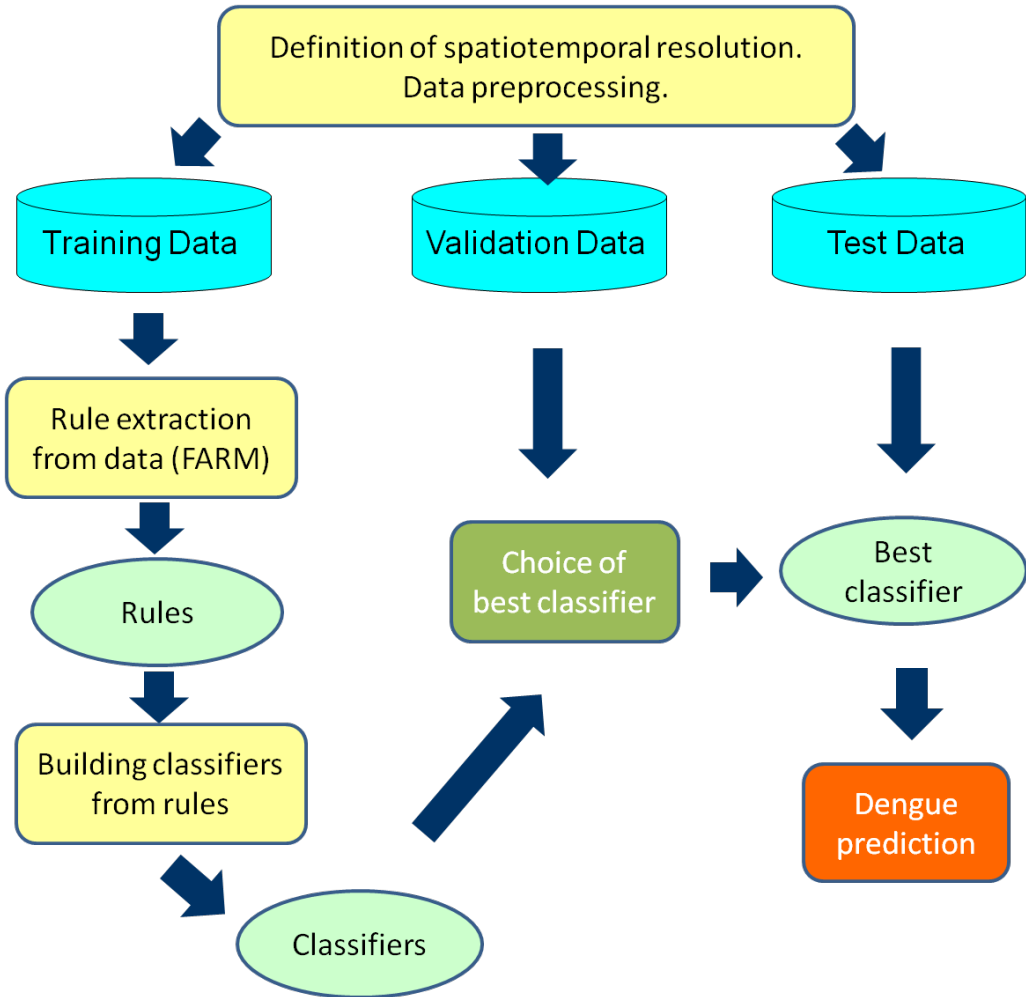

Supplement: 12911_2012_584_MOESM11_ESM.pdf [file 12911_2012_584_MOESM11_ESM.pdf]

Resolution  
of rainfall

Resolution of  
temperature

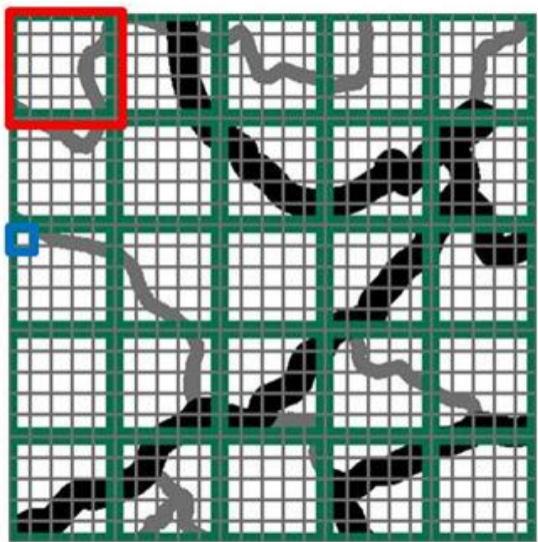

Supplement: 12911_2012_584_MOESM8_ESM.pdf [file 12911_2012_584_MOESM8_ESM.pdf]
